# Supplementary material for: Early Enteral Feeding Improves Tolerance of Parenteral Nutrition in Preterm Newborns
Source: MDPI journal article supplement (doi:10.3390/nu13113886), 2021-10-29
Supplement: s1 [file s1]

**Table S1.** Parenteral nutrition protocol.

|                             | Birth weight < 1000 g | Birth weight ≥ 1000 g |
|-----------------------------|-----------------------|-----------------------|
| <b>Energy</b> (kcal/kg/day) |                       |                       |
| Starting dose               | 45                    | 45                    |
| <i>At day of life</i>       | 0                     | 0                     |
| Target dose                 | 105                   | 100                   |
| <i>At day of life</i>       | 7                     | 7                     |
| <b>Proteins</b> (g/kg/day)  |                       |                       |
| Starting dose               | 2.0                   | 2.0                   |
| <i>At day of life</i>       | 0                     | 0                     |
| Target dose                 | 4.0                   | 3.5                   |
| <i>At day of life</i>       | 7                     | 7                     |
| <b>Dextrose</b> (g/kg/day)  |                       |                       |
| Starting dose               | 7.0                   | 7.0                   |
| <i>At day of life</i>       | 0                     | 0                     |
| Target dose                 | 14.0                  | 14.5                  |
| <i>At day of life</i>       | 7                     | 7                     |
| <b>Lipids</b> (g/kg/day)    |                       |                       |
| Starting dose               | 1.0                   | 1.0                   |
| <i>At day of life</i>       | 0                     | 0                     |
| Target dose                 | 3.5                   | 3.0                   |
| <i>At day of life</i>       | 7                     | 7                     |
